# Supplementary material
Source: Springer Nature journal article supplement (https://www.springermedizin.de/resource/supplementary/12943_2010_807_MOESM4_ESM.pdf/9554882)

## HK2

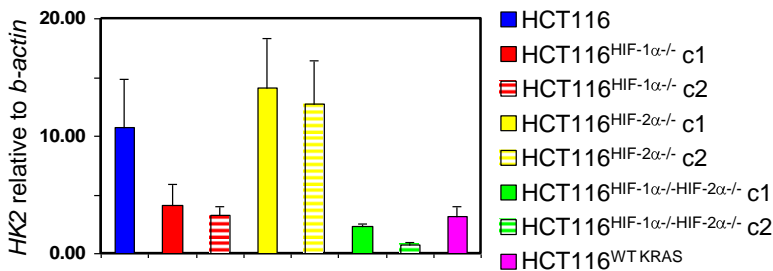

## LDHA

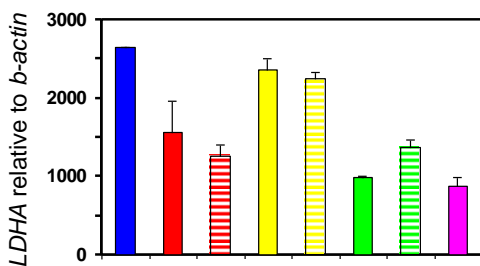

## MGLL

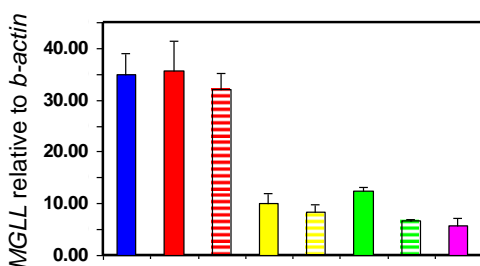

## ANGPTL4

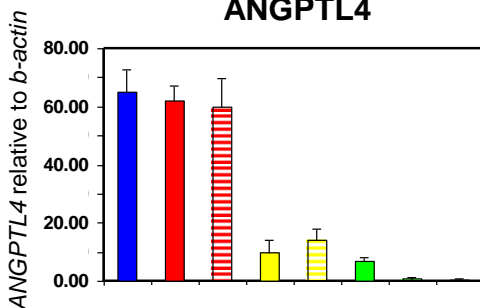

## VEGFA

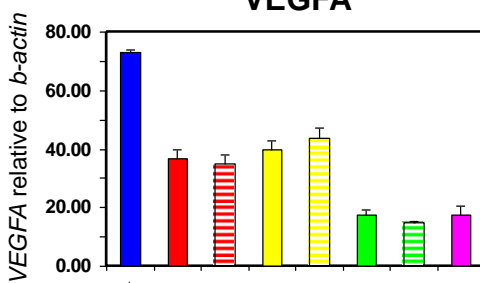

Supplement: MOESM4 [file 9554882]
